# Supplementary material
Source: ML conference proceedings conference paper supplement (https://openaccess.thecvf.com/content/CVPR2025/html/Zhang_Mitigating_Ambiguities_in_CVPR_2025_paper.html)
Supplement: Supplementary file 1 [file Zhang_Mitigating_Ambiguities_in_CVPR_2025_supplemental.pdf]

# Mitigating Ambiguities in 3D Classification with Gaussian Splatting

## Supplementary Material

### 1. GS Point Cloud Dataset

Fig. 1 presents GS point clouds and their corresponding rendering results from our GS Point Cloud Dataset, showcasing real-world examples across various categories.

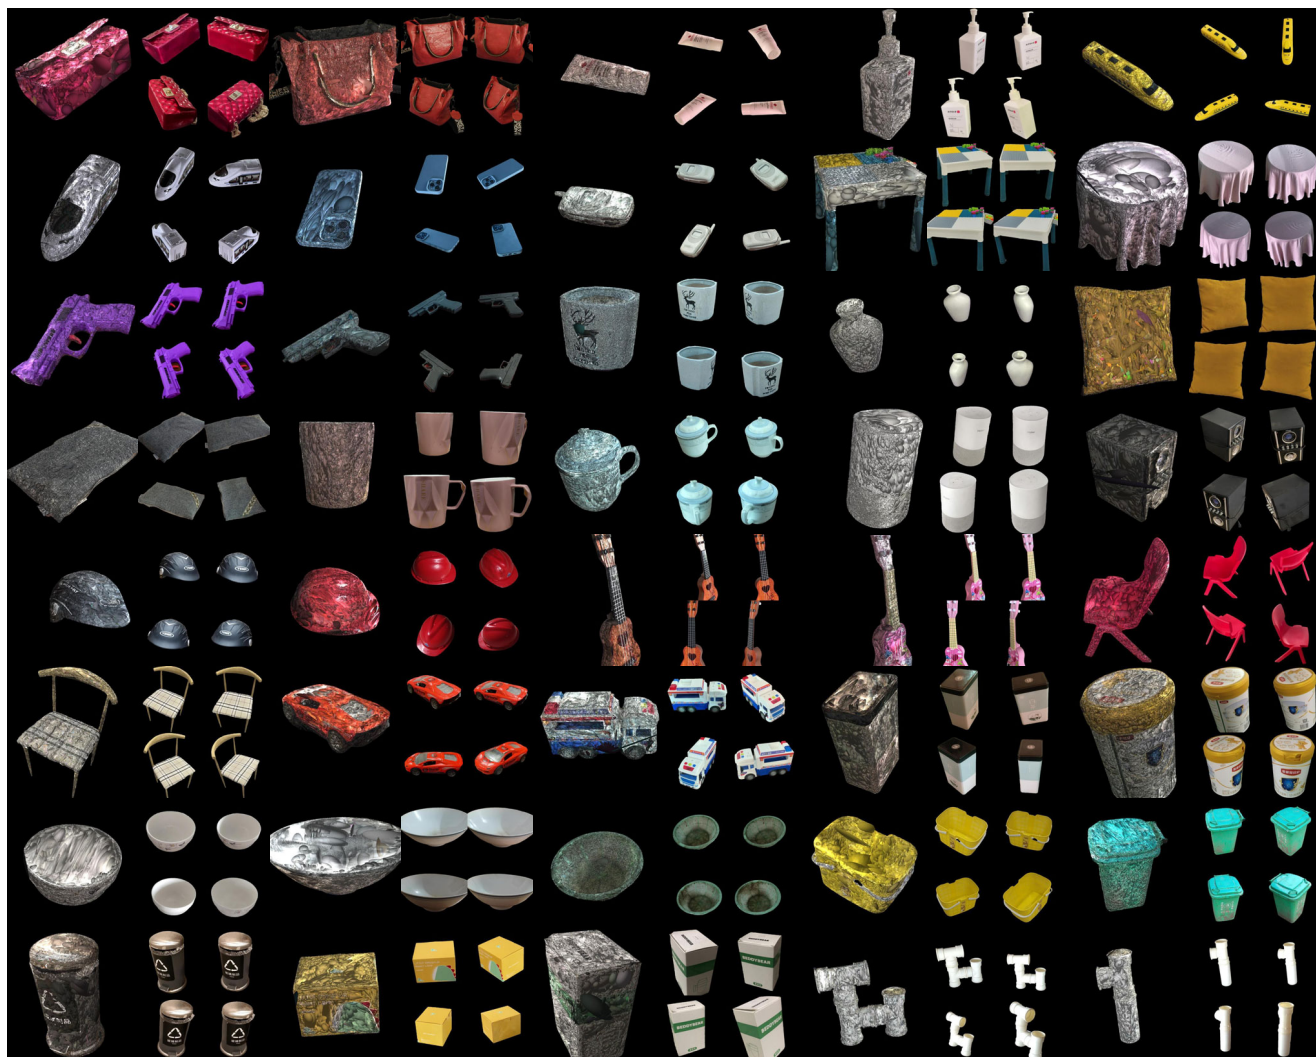

Figure 1. Visualization of GS point clouds and their corresponding rendering results from our GS Point Cloud Dataset.

## 2. Features Visualization

Figs. 2 to 4 provide additional t-SNE visualization results for PointNet++ [2], PointNeXt [3], and PointMLP [1].

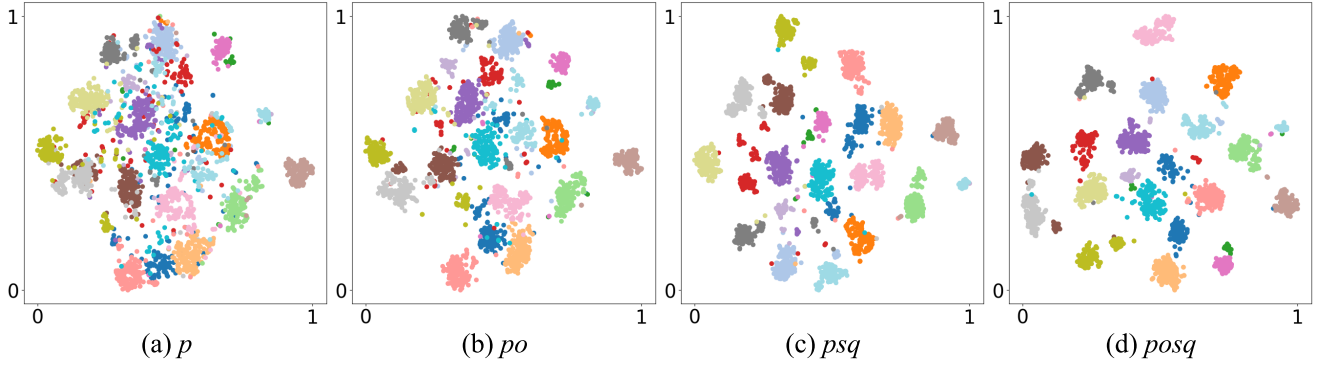

Figure 2. Visualizations of the global features in PointNet++ with different inputs using t-SNE technique. (a)-(d) are visualized features of network with only position, position+opacity, position+scale+rotation and position+opacity+scale+rotation inputs, respectively.

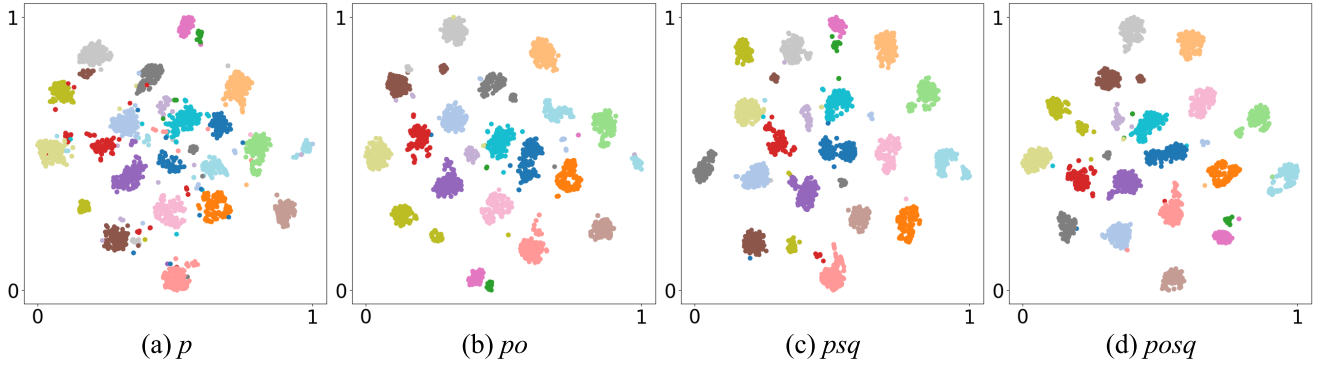

Figure 3. Visualizations of the global features in PointNeXt with different inputs using t-SNE technique. (a)-(d) are visualized features of network with only position, position+opacity, position+scale+rotation and position+opacity+scale+rotation inputs, respectively.

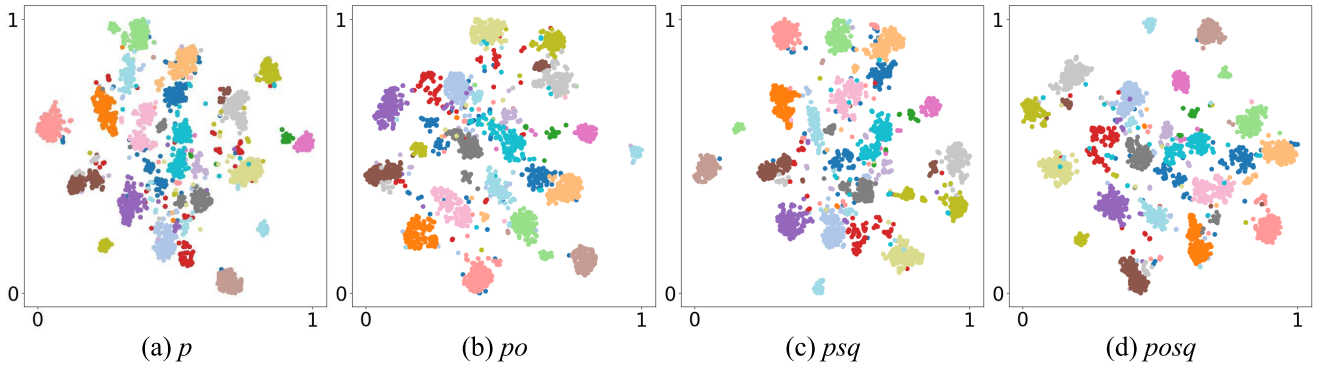

Figure 4. Visualizations of the global features in PointMLP with different inputs using t-SNE technique. (a)-(d) are visualized features of network with only position, position+opacity, position+scale+rotation and position+opacity+scale+rotation inputs, respectively.

## References

- [1] Xu Ma, Can Qin, Haoxuan You, Haoxi Ran, and Yun Fu. Rethinking network design and local geometry in point cloud: A simple residual MLP framework. In *International Conference on Learning Representations*, 2022. [2](#)
- [2] Charles Ruizhongtai Qi, Li Yi, Hao Su, and Leonidas J Guibas. Pointnet++: Deep hierarchical feature learning on point sets in a metric space. *Advances in neural information processing systems*, 30, 2017. [2](#)
- [3] Guocheng Qian, Yuchen Li, Houwen Peng, Jinjie Mai, Hasan Hammoud, Mohamed Elhoseiny, and Bernard Ghanem. Pointnext: Revisiting pointnet++ with improved training and scaling strategies. In *Advances in Neural Information Processing Systems (NeurIPS)*, 2022. [2](#)
